# Supplementary material
Source: publisher figshare collection journal article supplement (https://frontiersin.figshare.com/ndownloader/files/28447824)
Supplement: Supplementary file [file 28447824]

**7.1 Supplementary Material 1: Table displaying circulation figures by newspaper for 2020 and the newspapers used for the quantitative analysis of Study 1.**

| Newspaper               | TBR*      | -4        | -3        | -2        | -1         | 0          | 1          | 2          | 3          | 4         | 5         | 6         | 7         |
|-------------------------|-----------|-----------|-----------|-----------|------------|------------|------------|------------|------------|-----------|-----------|-----------|-----------|
|                         |           | 27/1--9/2 | 10/2-23/2 | 24/2-8/3  | 9/3-22/3   | 23/3-5/4   | 6/4-19/4   | 20/4-3/5   | 4/5-17/5   | 18/5-31/5 | 1/6-14/6  | 15/6-28/6 | 29/6-12/6 |
| <i>City A.M.</i>        | 85,738    | 1         | 1         |           | 2          | 1          |            |            |            |           |           |           |           |
| <i>Daily Express</i>    | 289,679   |           |           |           |            |            |            | 1          |            |           |           |           |           |
| <i>Daily Mirror</i>     | 441,934   |           | 2         | 1         | 6          | 2          | 1          | 1          | 21         | 9         | 2         |           |           |
| <i>Daily Record</i>     | 103,222   |           |           |           | 2          | 1          | 2          | 1          | 3          |           |           |           |           |
| <i>Daily Star</i>       | 432,909   |           |           |           |            |            |            |            |            |           |           |           |           |
| <i>Evening Standard</i> | 787,447   | 1         |           | 2         | 4          |            |            |            |            | 4         |           | 3         |           |
| <i>Financial Times</i>  | 155,009   | 2         | 1         | 6         | 13         | 24         | 11         |            | 11         | 1         | 2         | 2         | 2         |
| <i>i</i>                | 215,932   |           |           | 3         | 4          |            | 4          | 2          | 4          | 3         | 3         | 1         | 1         |
| <i>Metro</i>            | 1,419,614 |           |           | 1         |            |            |            |            | 2          | 1         |           | 3         | 1         |
| <i>The Telegraph**</i>  | 566,105   |           |           | 1         | 12         | 24         | 28         | 38         | 27         | 8         | 2         | 3         | 2         |
| <i>The Guardian</i>     | 281,900   | 2         | 2         | 2         | 20         | 13         | 4          | 19         | 20         | 30        | 8         | 10        | 9         |
| <i>The Independent</i>  | 13,908    | 3         |           |           | 7          | 12         | 8          | 10         | 4          | 7         | 1         | 4         | 2         |
| <i>The Mail</i>         | 2,200,207 | 1         | 3         | 4         | 15         | 3          | 3          |            |            | 14        | 15        | 10        | 11        |
| <i>The Sun</i>          | 1,206,595 |           |           | 1         | 1          | 8          | 3          | 4          | 2          | 5         | 2         |           | 1         |
| <i>The Times</i>        | 359,960   | 1         | 5         | 11        | 47         | 17         | 39         | 26         | 36         | 11        | 10        | 8         | 5         |
|                         |           | <b>11</b> | <b>14</b> | <b>32</b> | <b>133</b> | <b>105</b> | <b>103</b> | <b>102</b> | <b>130</b> | <b>93</b> | <b>45</b> | <b>44</b> | <b>34</b> |

\*Circulation numbers for February 2020 taken from ABC for average monthly circulation.

\*\*Not audited by ABC from February 2020, circulation number based on January 2020
